# Supplementary material for: The Occurrence of Microplastics in Donax trunculus (Mollusca: Bivalvia) Collected along the Tuscany Coast (Mediterranean Sea)
Source: MDPI journal article supplement (doi:10.3390/ani14040618), 2024-02-14
Supplement: s1 [file s1]

**Table S1.** Specimens collected within the five production areas with code, collection date and collection site (VL: Viareggio Levante; VP: Viareggio Ponente; G- Pi: Gombo Pisa; G-SGT: Gombo San Giuliano Terme; CCT: Centro Coni and Tirrenia).

| Sample code | Collection date | Collection site |
|-------------|-----------------|-----------------|
| 1T          | 16/2/2021       | VL              |
| 2T          | 16/2/2021       | VP              |
| 3T          | 3/3/2021        | GOMBO Pi        |
| 4T          | 3/3/2021        | CCT             |
| 5T          | 11/3/2021       | VP              |
| 6T          | 11/3/2021       | VL              |
| 7T          | 23/3/2021       | G- SGT          |
| 8T          | 23/3/2021       | G- PI           |
| 9T          | 31/5/2021       | CCT             |
| 10T         | 31/5/2021       | G- SGT          |
| 11T         | 1/6/2021        | VP              |
| 12T         | 1/6/2021        | VL              |
| 13T         | 11/6/2021       | G- Pi           |
| 14T         | 11/6/2021       | G- SGT          |
| 15T         | 23/6/2021       | G- SGT          |
| 16T         | 23/6/2021       | CCT             |
| 17T         | 30/6/2021       | G- Pi           |
| 18T         | 30/6/2021       | VL              |
| 19T         | 30/6/2021       | VP              |
| 20T         | 22/7/2021       | G- SGT          |

|     |            |        |
|-----|------------|--------|
| 21T | 22/7/2021  | G- Pi  |
| 22T | 22/7/2021  | CCT    |
| 23T | 22/7/2021  | VL     |
| 24T | 22/7/2021  | VP     |
| 25T | 13/8/2021  | CCT    |
| 26T | 13/8/2021  | G- Pi  |
| 27T | 26/8/2021  | VL     |
| 28T | 26/8/2021  | G- SGT |
| 29T | 26/8/2021  | CCT    |
| 30T | 16/9/2021  | G- Pi  |
| 31T | 16/9/2021  | G- SGT |
| 32T | 13/10/2021 | G- SGT |
| 33T | 13/10/2021 | CCT    |
| 34T | 27/10/2021 | G- Pi  |
| 35T | 15/12/2021 | CCT    |
| 36T | 18/11/2021 | VL     |
| 37T | 18/11/2021 | VL     |
| 38T | 24/11/2021 | G- Pi  |
| 39T | 24/11/2021 | G SGT  |

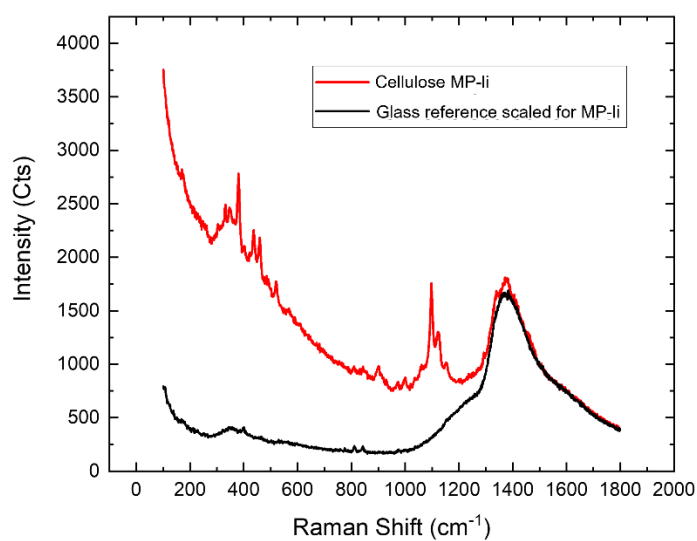

**Figure S1.** Raman spectrum of a cellulose microfiber (red line) extracted from samples of *Donax trunculus*. At the time of Raman analysis, microfiber was placed onto scotch tape previously attached to glass slide and covered with a glass coverslip. The black line represents the spectrum of the background collected before the microfiber analysis and the reference of the glass can be observed at the same height.

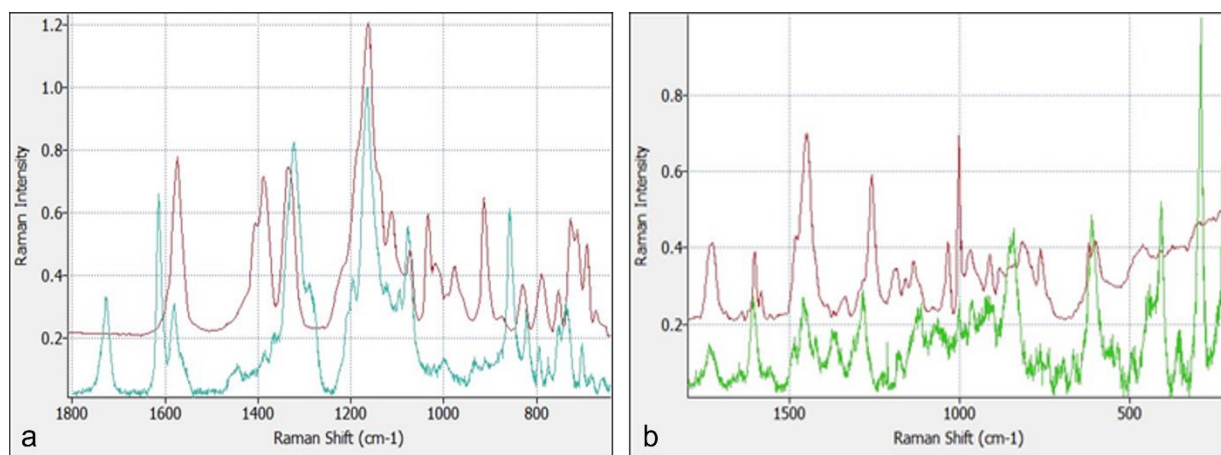

**Figure S2.** Raman spectra of a microfiber (a) and a microfragment (b) and the related reference library spectra extracted from samples of *Donax trunculus*. Both microitems were identified as plastic copolymers; in detail, microfiber as Poly(styrene-ethylene-butylene) and microfragment as Poly[(2,3-epoxypropyl methacrylate):Styrene:Ethylene Dimethacrylate)].

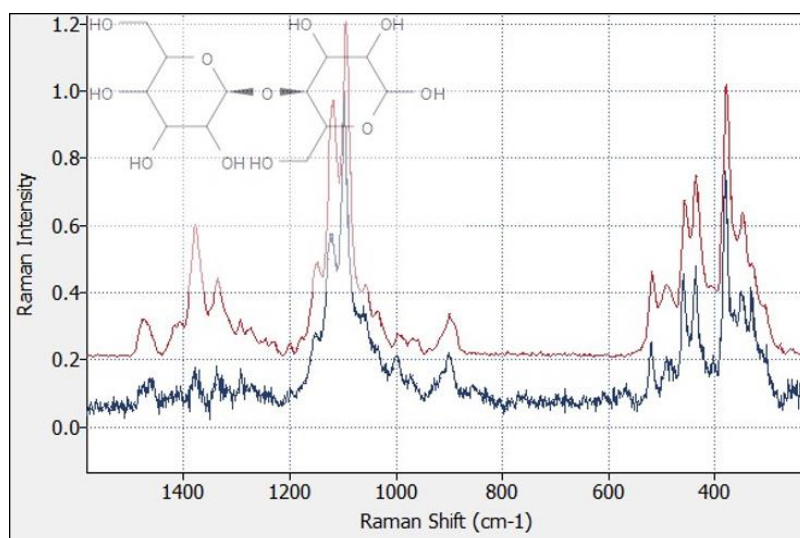

**Figure S3.** Raman spectra of a microfibril (blue line) and the related reference library spectrum (red line) extracted from samples of *Donax trunculus*. The microfibril was identified as microcrystalline cellulose.

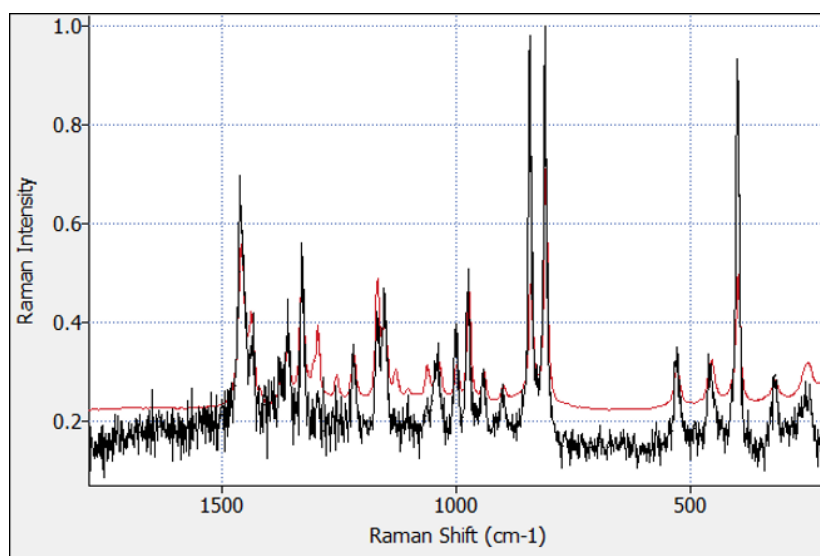

**Figure S4.** Raman spectrum of scotch tape (black line) used to transport microitems extracted from samples of *Donax trunculus*. The spectrum matched with the Raman fingerprint of polypropylene (red line).
